# Supplementary material for: Preterm Infants on Early Solid Foods and Vitamin D Status in the First Year of Life—A Secondary Outcome Analysis of a Randomized Controlled Trial
Source: MDPI journal article supplement (doi:10.3390/nu14153105), 2022-07-28
Supplement: s1 [file s1]

**Table S1.** Detailed results from the linear mixed effects model for serum vitamin D at all study visits.

| Covariates                                     | 6 weeks corrected age    |          | 6 months corrected age |          | 12 months corrected age |          |
|------------------------------------------------|--------------------------|----------|------------------------|----------|-------------------------|----------|
|                                                | estimate (95% CI)        | <i>p</i> | estimate (95% CI)      | <i>p</i> | estimate (95% CI)       | <i>p</i> |
| Group (late)                                   | 2.05 (−5.46 to 9.51)     | 0.59     | 3.51 (−0.35 to 7.37)   | 0.07     | 3.37 (−0.32 to 7.06)    | 0.07     |
| Cumulative vitamin D supplementation (IE/days) | −0.03 (−0.07 to 0.01)    | 0.16     | −0.01 (−0.03 to 0.01)  | 0.28     | 0.002 (−0.01 to 0.01)   | 0.76     |
| Sex (male)                                     | −6.30 (−13.04 to 0.44)   | 0.07     | 2.09 (−1.48 to 5.66)   | 0.23     | 1.99 (−1.11 to 5.08)    | 0.20     |
| Gestational age at birth (days)                | 0.07 (−0.20 to 0.34)     | 0.58     | −0.10 (−0.24 to 0.04)  | 0.15     | −0.06 (−0.19 to 0.08)   | 0.38     |
| Nutrition at discharge (formula)               | −13.43 (−22.65 to −4.20) | 0.005    | −3.50 (−8.38 to 1.39)  | 0.16     | −1.51 (−6.24 to 3.22)   | 0.53     |
| Nutrition at discharge (mix)                   | −5.61 (−14.76 to 3.53)   | 0.23     | −0.49 (−5.32 to 4.35)  | 0.84     | −0.43 (−4.84 to 3.98)   | 0.85     |

For the evaluation of differences between the early and late feeding group the following fixed effects were included: cumulative vitamin D supplementation (IE/days), gestational age at birth, sex, nutrition at discharge. A random intercept was fit to account for possible correlation between siblings of multiple births. CI, Confidence interval.
